# Supplementary material for: Three-dimensionally ordered macroporous carbons having walls composed of hollow mesosized spheres
Source: Royal Society of Chemistry journal article supplement (doi:10.1039/b607196a), 2006-01-01
Supplement: b607196a.pdf [file b607196a.pdf]

## Three dimensionally ordered macroporous carbons having walls composed of hollow mesosized spheres

Sang-Wook Woo, Kaoru Dokko, Keiji Sasajima, Takashi Takei, and Kiyoshi Kanamura\*

Department of Applied Chemistry, Graduate School of Urban Environmental Sciences,  
Tokyo Metropolitan University, 1-1 Minami-ohsawa, Hachioji, Tokyo 192-0397, Japan

Fax: +81-426-77-2828; Tel: +81-426-77-2828; E-mail:

kanamura-kiyoshi@c.metro-u.ac.jp

### Electronic Supplementary Information

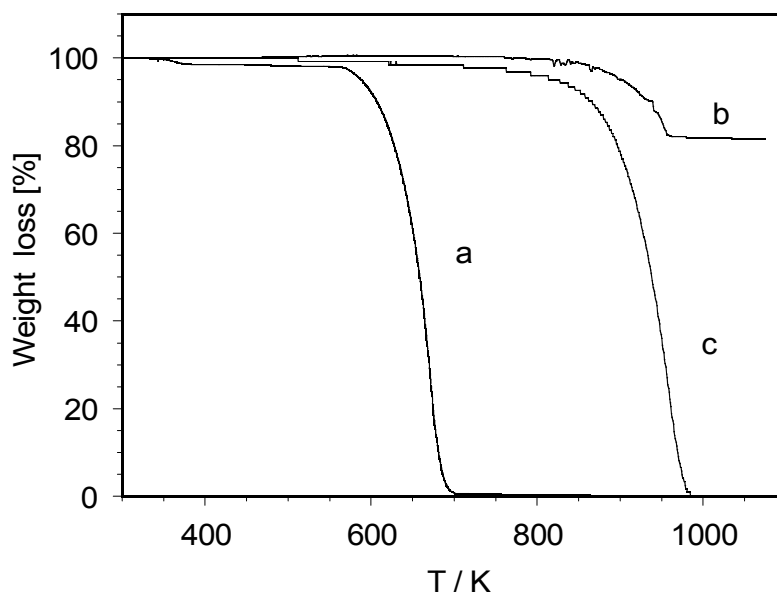

**Fig. S1** Thermogravimetric analysis results of PSHEMA (under nitrogen flow: 30 mL min<sup>-1</sup>) (a), composite of carbon-silica (40~50 nm) (in air) (b), and the porous carbon (in air) (c).

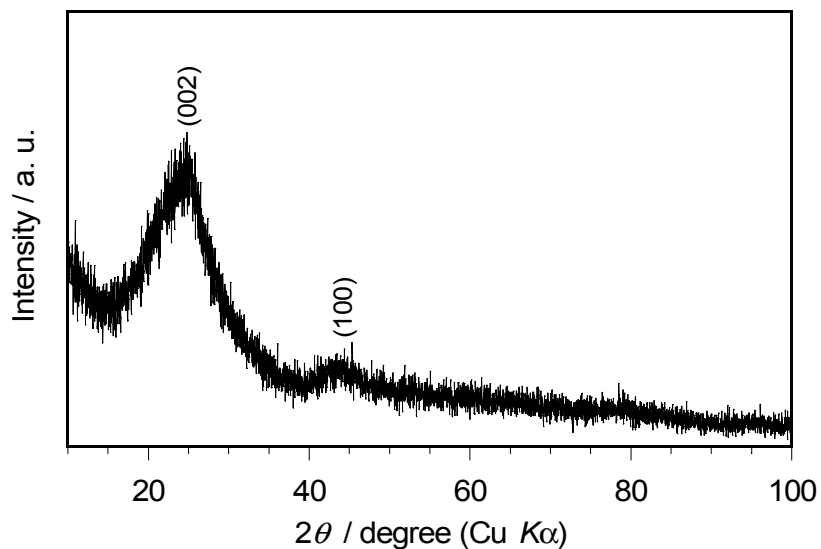

**Fig. S2** X-ray diffraction (XRD) pattern of 3D ordered porous carbon made from PSHEMA-CS10 composite. XRD was measured using RINT2000 instrument (Rigaku) with Cu K $\alpha$  radiation.

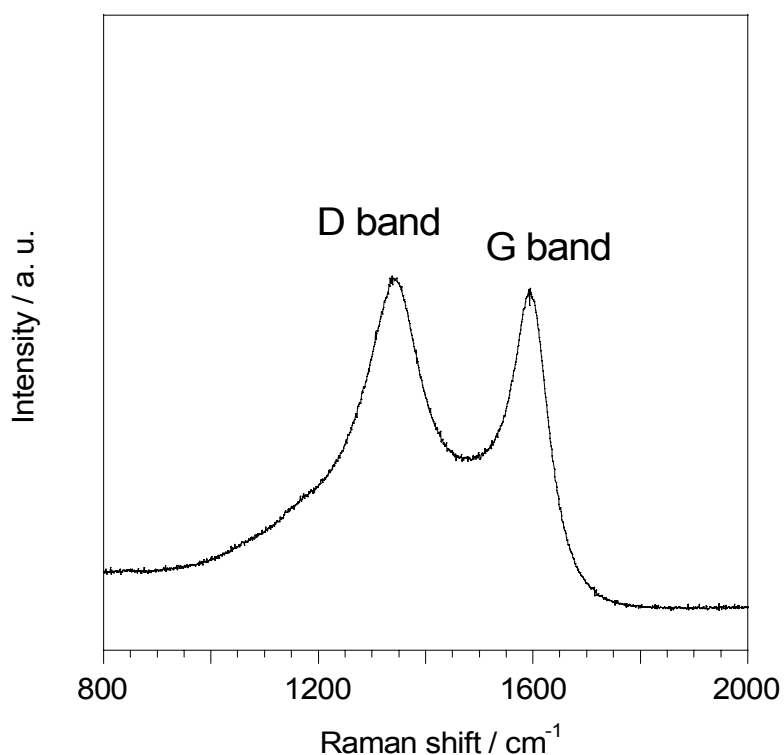

**Fig. S3** Raman spectrum of 3D ordered porous carbon made from PSHEMA-CS10 composite. Raman spectrum was measured using NRS-1000 system (Jasco) with 532 nm laser radiation (spot size: ca. 5  $\mu$ m)
